## 7T VS 3T BRAIN MORPHOMETRICS WITH AGE

# 1 Brain morphometrics correlations with age among 2 352 participants imaged with both 3T and 7T MRI: 3 7T improves statistical power and reduces required 4 sample size

5

6 Cong Chu<sup>1#</sup>, Tales Santini, PhD<sup>1#</sup>, Jr-Jiun Liou, PhD<sup>1</sup>, Ann D. Cohen PhD<sup>2</sup>, Pauline M. Maki  
7 PhD<sup>3</sup>, Anna L. Marsland, PhD<sup>4</sup>, Rebecca C. Thurston, PhD<sup>5</sup>, Peter J. Gianaros, PhD<sup>6</sup>, Tamer S.  
8 Ibrahim, PhD<sup>7\*</sup>

9

10 <sup>1</sup>Department of Bioengineering, University of Pittsburgh, Pittsburgh, Pennsylvania, USA

11 <sup>2</sup>Department of Psychiatry, University of Pittsburgh, Pittsburgh, Pennsylvania, USA

12 <sup>3</sup>Departments of Psychiatry, Psychology and Obstetrics & Gynecology, University of Illinois  
13 Chicago, Chicago, Illinois, USA

14 <sup>4</sup>Department of Psychology, University of Pittsburgh, Pittsburgh, Pennsylvania, USA

15 <sup>5</sup>Departments of Psychiatry, Clinical and Translational Science, Epidemiology and Psychology,  
16 University of Pittsburgh, Pittsburgh, Pennsylvania, USA

17 <sup>6</sup>Departments of Psychology and Psychiatry, University of Pittsburgh, Pittsburgh, Pennsylvania,  
18 USA

19 <sup>7</sup>Departments of Bioengineering, Psychiatry, and Radiology, University of Pittsburgh, Pittsburgh,  
20 Pennsylvania, USA

21

22 <sup>#</sup>Contributed equally and share the first authorship

23

24 <sup>\*</sup>Correspondence:

25 Tamer S. Ibrahim, PhD

26 Professor of Bioengineering, Psychiatry, and Radiology

## 7T VS 3T BRAIN MORPHOMETRICS WITH AGE

- 27 Director, 7 Tesla Bioengineering Research Program (7TBRP)
- 28 Swanson School of Engineering, and School of Medicine
- 29 University of Pittsburgh
- 30 3501 Fifth Avenue, Pittsburgh, PA 15213
- 31 [tibrahim@pitt.edu](mailto:tibrahim@pitt.edu)
- 32
- 33 Word count: 4370

## 7T VS 3T BRAIN MORPHOMETRICS WITH AGE

### 34 **Abstract**

#### 35 *Introduction*

36 Magnetic resonance imaging (MRI) at 7 Telsa (7T) has superior signal-to-noise ratio to 3 Telsa  
37 (3T) but also presents higher signal inhomogeneities and geometric distortions. A key knowledge  
38 gap is to robustly investigate the sensitivity and accuracy of 3T and 7T MRI in assessing brain  
39 morphometrics. This study aims to (a) aggregate a large number of paired 3T and 7T scans to  
40 evaluate their differences in quantitative brain morphological assessment using a widely  
41 available brain segmentation tool, FreeSurfer, as well as to (b) examine the impact of  
42 normalization methods for subject variability and smaller sample sizes on data analysis.

#### 43 *Methods*

44 A total of 452 healthy participants aged 29 to 68 were imaged at both 3T and 7T. Structural T1-  
45 weighted magnetization-prepared rapid gradient-echo (MPRAGE) images were processed and  
46 segmented using FreeSurfer. To account for head size variability, the brain volumes underwent  
47 intracranial volume (ICV) correction using the Residual (regression model) and Proportional  
48 (simple division to ICV) methods. The resulting volumes and thicknesses were correlated with  
49 age using Pearson correlation and false discovery rate correction. The correlations were also  
50 calculated in increasing sample size from 3 to the whole sample to estimate the sample size  
51 required to detect aging-related brain variation.

#### 52 *Results*

53 352 subjects (210 females) passed the image quality control with 100 subjects excluded due to  
54 excessive motion artifacts on 3T, 7T, or both. 7T MRI showed an overall stronger correlation  
55 between morphometrics and age and a larger number of significantly correlated brain volumes  
56 and cortical thicknesses. While the ICV is consistent between both field strengths, the Residual  
57 normalization method shows markedly higher correlation with age for 3T when compared with  
58 the Proportional normalization method. The 7T results are consistent regardless of the  
59 normalization method used.

#### 60 *Conclusion*

61 In a large cohort of healthy participants with paired 3T and 7T scans, we compared the statistical  
62 performance in assessing age-related brain morphological changes. Our study reaffirmed the  
63 inverse correlation between brain volumes and cortical thicknesses and age and highlighted  
64 varying correlations in different brain regions and normalization methods at 3T and 7T. 7T  
65 imaging significantly improves statistical power and thus reduces required sample size.

### 66 **Keywords**

67 Magnetic resonance imaging, 3T, 7T, brain morphometrics, aging

### 68 **Key points**

- 69 1. Compared to 3T, 7T has stronger inverse correlations of total grey matter, subcortical  
70 grey matter, and white matter volumes, and mean cortical thickness with age.

## 7T VS 3T BRAIN MORPHOMETRICS WITH AGE

- 71 2. Compared to 3T, 7T shows a greater number of brain volumes and cortical thicknesses  
72 that have statistically significant correlations with age.
- 73 3. For comparable statistical power at 3T, the required sample size for 7T is reduced for  
74 cortical and subcortical volumes, and substantially reduced for cortical thicknesses.

### 75 **Introduction**

76 Magnetic Resonance Imaging (MRI) provides optimal *in vivo* soft tissue contrast and is  
77 the method of choice to investigate many cerebral abnormalities such as tumors, atrophy,  
78 vascular diseases, demyelinating diseases, trauma, infection, and developmental anomalies  
79 (Barisano et al., 2019). The current state of the art clinical usage of MRI could shift from  
80 scanners with a static magnetic field of 3 Tesla (T) to the recently FDA-cleared 7T MRI (US  
81 FDA, 2024). However, this change is not merely a rescaling of the system but a major  
82 engineering challenge.

83 The 7T MRI offers a higher signal-to-noise ratio (SNR) due to its inherently higher spin  
84 signal, as well as improved tissue contrast due to longer T1 and shorter T2 and T2\* relaxation  
85 times, which help to enhance image and angiography contrasts (Okada et al., 2022; Perera  
86 Molligoda Arachchige & Garner, 2023). Moreover, its higher sensitivity to susceptibility  
87 differences enhances BOLD contrast (Okada et al., 2022; Perera Molligoda Arachchige &  
88 Garner, 2023), which is often used in functional imaging. However, the shorter wavelength of the  
89 electromagnetic excitation at 7T increases image inhomogeneity (Ibrahim et al., 2007) and  
90 average/local power deposition (Ibrahim & Tang, 2007) for neuroimaging. Both increased  
91 average and local power deposition limits the maximum allowed power to be used during the  
92 scans (Fiedler et al., 2018). Moreover, the increased sensitivity to susceptibility can cause  
93 distortions and artifacts in regions with thin air-brain interfaces, such as the sinus (Truong et al.,  
94 2006), depending on the subject's anatomy. Structural images can also be contaminated with  
95 angiography signals, making it difficult for automated segmentation tools to determine brain  
96 volumes in specific regions (Choi et al., 2020; Viviani et al., 2017)

97 Given these trade-offs, there is a need to investigate the sensitivity and specificity of  
98 using 3T and 7T MRI to brain morphometrics in a large data set where the same subjects  
99 undergo scans at both field strengths. With no clear ground truth in whole brain morphometrics,  
100 prior studies have shown that after the human brain reaches its maximum volume between the  
101 ages of 25-30 (Fjell et al., 2014; Fjell, 2010), a subject-specific loss of cerebral volume is  
102 expected over time. Therefore, MR studies have typically investigated the morphological  
103 characteristics and atrophy of brain regions in relation to aging. Studies have found that total  
104 grey matter volumes decrease consistently over age, while individual regions showed specificity  
105 in their rate of decrease (Fjell et al., 2014; Fjell, 2010). Cortical thicknesses have also been  
106 observed to negatively correlate with age (Fjell et al., 2014; Fjell, 2010). White matter volume,  
107 on the other hand, differed from grey matter such that it shows modest changes until 40-50 years  
108 before a rapid decrease in volume (Fjell et al., 2014; Fjell, 2010).

109 Compared to 3T, 7T MRI has been shown to provide improved spatial resolution for the  
110 same acquisition times (Okada et al., 2022; Perera Molligoda Arachchige & Garner, 2023).  
111 However, due to field inhomogeneities, 7T structural images provided restricted performance  
112 improvement regarding clinical diagnosis (Springer et al., 2016) and morphometric assessment  
113 (Lusebrink et al., 2013; Seiger et al., 2015). These studies, however, were limited by their small

## 7T VS 3T BRAIN MORPHOMETRICS WITH AGE

114 sample size of paired 3T and 7T images and by the hardware limitations such as commercial  
115 radiofrequency (RF) coils. Our study aims to analyze a large number of same-subject 3T and 7T  
116 scans (> 400) to investigate their performance difference in quantitative brain morphological  
117 assessment using a widely available brain segmentation tool, FreeSurfer, in addition to  
118 homogeneous RF coils that largely eliminate field inhomogeneities and signal voids at 7T  
119 (Andrea N Sajewski, 2023; Kim et al., 2016; Krishnamurthy et al., 2019; Santini et al., 2021;  
120 Santini et al., 2018). Specifically, we investigated how different statistical analysis and  
121 normalization methods may affect the resulting statistical power including correlation strength  
122 and sample size. Finally, provide regression models of the expected regional brain volumes and  
123 cortical thicknesses by age.

### 124 **Methods**

#### 125 *Participants*

126 The dataset was pooled from multiple studies (NIH RF1AG053504, R01AG053504,  
127 P01HL040962, and R01DK110041) recruiting healthy participants under the Institutional  
128 Review Board of The University of Pittsburgh, Pittsburgh, USA. Prior to their initial visit,  
129 participants underwent a comprehensive informed consent process, which included a detailed  
130 review of the study's objectives. Participants were eligible if they were between the ages of 18  
131 and 80 and had no contraindication to an MRI scan. Additionally, screening for pre-existing  
132 dementia was conducted using both the Informant Questionnaire on Cognitive Decline in the  
133 Elderly and the Clinical Dementia Rating scale for exclusions.

#### 134 *Data Collection*

135 Before quality control, in total, 452 subjects had completed paired 3T and 7T MPRAGE  
136 sequence with an average (SD) interval of 4.96 (4.16) year. The 7T scans were acquired using a  
137 7T Magnetom system in the sTx mode (single channel) with either the first (16 - combined into  
138 one - transmit and 32 receive channels) or second (60 transmit - combined into one - transmit  
139 and 32 receive channel) generation of in-house-designed Tic-Tac-Toe RF coil systems. These RF  
140 coil systems are known for producing homogeneous images (Andrea N Sajewski, 2023; Kim et  
141 al., 2016; Krishnamurthy et al., 2019; Santini et al., 2021; Santini et al., 2018). The 3T scans  
142 were acquired with either a Trio or PRISMA systems and utilized an integrated whole-body RF  
143 coil for excitation and a commercial 32-ch coil for reception. Description of the acquisition  
144 parameters and type of sequences are provided in **Table 1**.

#### 145 *Image Processing*

146 Both 3T and 7T scans were processed using the same pipeline. The images were  
147 corrected for gradient distortion [<https://github.com/Washington-University/gradunwarp>] and  
148 then underwent intensity bias correction using SPM12 (*Statistical Parametric Mapping: The*  
149 *Analysis of Functional Brain Images*, 2006). Brain stripping was performed using SynthStrip  
150 (Hoopes et al., 2022) followed by a 6 DOF rigid registration to MNI space with their respective  
151 resolution using Greedy (<https://github.com/pyushkevich/greedy>). Finally, brain volumes and  
152 cortical thicknesses were extracted using FreeSurfer version 7.1.1 (Fischl, 2012) and using the  
153 “highres” flag. Intracranial volumes were calculated from the brain mask output of SynthStrip.

## 7T VS 3T BRAIN MORPHOMETRICS WITH AGE

154 The quality control process of the FreeSurfer segmentation output began with classifying  
155 the scans into three grades: 1) pass, 2) re-run, and 3) fail. For grade 2 scans, control points were  
156 placed on white matter regions that failed to be identified by FreeSurfer. After the re-run with  
157 control points, scans were reclassified into either pass or fail. If a subject had either 3T or 7T  
158 segmentation classified as failed, both 3T and 7T scans were excluded from the analysis. We also  
159 identified and excluded regions that are not consistently segmented due to the presence of dura,  
160 or due to the presence of arteries on the 7T images but not on the 3T images. Both issues impact  
161 the accuracy as well as the consistency of the FreeSurfer segmentation of the excluded cortical  
162 regions on both the 3T and 7T images.

### 163 *Statistical Analysis*

164 The volume of the brain regions underwent intracranial volume (ICV) correction using  
165 two methods (Wang et al., 2024): In the Residual method, the regions along with ICV and sex  
166 were entered into a multiple regression. We extracted the residuals which represented the  
167 morphometric information without the effect of ICV and sex. In the Proportional method: the  
168 volume regions were divided by their respective ICV and then corrected for sex using regression.  
169 Cortical thicknesses were only corrected by sex.

170 Each region was then correlated with age using Pearson correlations in MATLAB  
171 (version R2022a) (MathWorks, Natick MA). Multiple comparison corrections using Benjamini–  
172 Hochberg method for False Discovery Rate (FDR) (Benjamini & Hochberg, 1995) were then  
173 performed on the p-values within groups separated by cortical volumes, cortical thicknesses, and  
174 subcortical volumes. Regions with FDR corrected p-values lower than 10% FDR threshold were  
175 considered significantly correlated with age. Linear regression was used to calculate the slope of  
176 the correlation. The regions were also fitted with a second order polynomial to estimate the effect  
177 of aging on the rate of volume or thickness change. When comparing the correlation coefficient  
178 between 3T and 7T data, z-test was performed on the R values undergoing Fisher’s z  
179 transformation. The correlation coefficient was statistically stronger than one another when the  
180 resulting one-tailed p value was less than 0.05.

181 To evaluate the effects of the sample size in the number of regions significantly  
182 correlated with age, the correlations were calculated in increasing sample size (n = 3 to full  
183 sample) for 3T and 7T scans. Each subsample was randomly selected 1000 times without  
184 repeating to estimate the error range.

185 For cortical grey matter volume regions, we also calculated the annual rate of change.  
186 The linear regression equation was used to calculate the volume at the median age of the  
187 population and the change of volume in one year.

## 188 **Results**

### 189 *Demographics and quality control outcomes*

190 352 subjects out of 452 (female = 210) ranged between 29 and 68 years passed the  
191 quality control and were included in the analysis. 100 subjects were excluded due to motion  
192 artifacts. Demographics, including sex, race, and years of education, as well as the medical  
193 history of the dataset included in the analysis are shown in **Table 2**. Of the participants imaged,

## 7T VS 3T BRAIN MORPHOMETRICS WITH AGE

194 59.7% are female, 87.5% are white, and received 17.3 years of education (16 = college graduate;  
195 18 = master's degree). Less than 5% of them have high blood pressure, heart murmur, and  
196 anxiety disorders. Participants completed their 3T scan at a mean age of 45.7 years,  
197 approximately five years prior to the 7T scan (50.9 years).

198 The quality control process also identified 6 cortical regions (entorhinal,  
199 parahippocampal, rostral anterior cingulate, caudal anterior cingulate, insula, and transverse  
200 temporal) where FreeSurfer was not able to generate accurate and consistent segmentations due  
201 to the presence of blood vessels and dura. Examples can be found in **Supplementary Figure S1**.  
202 We therefore removed these regions when comparing the correlation results between 3T and 7T.  
203 Statistics of the removed regions are still included in **Supplementary Table S1**. The correlation  
204 results therefore included 50 cortical volumes and 50 cortical thicknesses, and 38 subcortical  
205 volumes.

### 206 *Correlations of brain volumes and cortical thicknesses with age*

207 Correlation between regional brain morphometrics and age from 352 pairs of 3T and 7T  
208 scans were calculated. **Figure 1** provides an overview of the results by categorizing the regions  
209 into total cortical grey matter volumes, total subcortical grey matter volumes, cerebral white  
210 matter volumes, and mean cortical thickness. For cortical and subcortical grey matter volumes,  
211 we saw both types of ICV corrections improved the correlation coefficient with age at 7T while  
212 weakening it at 3T. Pearson's R values at 7T were significantly higher than at 3T using both the  
213 Residual and Proportional methods for both the cortical ( $p_{\text{Residual}} < 1e-4$ ,  $p_{\text{Proportional}} < 1e-7$ ) and  
214 subcortical ( $p_{\text{Residual}} < 1e-5$ ,  $p_{\text{Proportional}} < 1e-3$ ) grey matter volumes. While not notably changing  
215 the outcomes at 7T, the Residual method showed better R values at 3T when compared to the  
216 Proportional method. These results were independent of the ICV estimations, since they were  
217 almost identical at 3T and 7T ( $R=0.98$ , Figure 4). White matter volume showed weaker  
218 correlation with age than grey matter and had failed to show significance at 3T with both ICV  
219 correction methods. Mean cortical thickness which included sex only correction also failed to  
220 show significance at 3T while showing strong significance ( $p < 1e-10$ ) and R value (-0.34) at 7T.

221 Pearson's R values mapped into individual cortical regions are illustrated in **Figure 2**.  
222 The regions in the frontal and occipital lobe showed a generally stronger correlation than the  
223 temporal and parietal lobe. Regions with a strong correlation such as the superior frontal gyrus  
224 can be found significant at both 3T and 7T. **Supplementary Table S1** lists the correlation results  
225 of all regional brain volumes and cortical thicknesses after FDR correction (using the residual  
226 methods for ICV correction), as well as the respective linear regression slope and second-degree  
227 coefficient of the polynomial fit. When using the Residual method, 48 (50) out of 54 cortical  
228 volumes, 12 (40) out of 54 cortical thicknesses, and 25 (27) out of 38 sub-cortical volumes were  
229 found significantly correlated with age at 3T (7T). When using the Proportional method, 32 (53)  
230 out of 54 cortical volumes, 12 (40) out of 54 cortical thicknesses, and 21 (24) out of 38 sub-  
231 cortical volumes were found significant at 3T (7T).

232 The relationship between number of significant regions and sample size (N from 3 to  
233 352) at 3T and 7T considering the different methods of ICV corrections is shown in **Figure 3**.  
234 For all brain volumes and cortical thicknesses combined, 32% ( $n = 111$ ) of the 7T sample size  
235 were required to reach 85 significant regions found from the full 3T sample size ( $n = 352$ ),  
236 corrected for ICV using the Residual method which achieves better correlation than the

## 7T VS 3T BRAIN MORPHOMETRICS WITH AGE

237 Proportional method most especially at 3T. When considering only cortical volumes  
238 (thicknesses), 73% (12%) of the 7T sample size were required to reach the same number of  
239 significant regions when compared with the full sample of 3T. For all 74 regions that were  
240 significant at both 3T and 7T, we compared the correlation coefficients and found that 20 (1,  
241 Optic Chiasm) regions had statistically stronger R value at 7T (3T) than the other field strength.  
242 **Supplementary Table S1** lists the p value for comparison between all regions.

243 **Figure 4** first affirmed the consistent ICV calculation between 3T and 7T, with a  
244 Pearson's  $R=0.98$ . It then displayed the effect of ICV correction by showing the linear regression  
245 between corrected total cortical grey matter volume and ICV. Despite the fact that the Residual  
246 method proved to be effective at both 3T and 7T, interestingly we saw that the 7T images are less  
247 sensitive to the method of ICV correction.

248 We also mapped the cortical volume annual rate of change onto a brain atlas in **Figure 5**.  
249 The mean rate of change among regions with significant correlation with age was 0.32% for both  
250 3T and 7T. We saw the frontal and occipital lobe, along with part of the temporal lobe volume  
251 decrease faster in general. The Residual method was used for this analysis.

## 252 Discussion

253 In this study, we analyzed a large dataset of paired 3T and 7T MR images acquired on  
254 normal aging adults from 29 to 68 years of age, which allowed us to characterize the difference  
255 in their statistical performance when assessing cross-sectionally the brain morphometrics  
256 correlations as we age. We showed a heterogeneous negative correlation between brain volume  
257 and age while providing an overview of how correlation of individual brain regions may be  
258 observed differently at either 3T or 7T. When subjected to a feasible scan time, less subjects  
259 would be necessary by scanning at 7T, providing studies with more flexibility to acquire  
260 additional sequences and/or save costs. When considering cortical thicknesses, which is required  
261 for AD cortical signature detection (Dickerson et al., 2009), only 7T provides sufficient brain  
262 coverage and sensitivity to aging effects.

263 The innovative radiofrequency coil developments (Andrea N Sajewski, 2023; Kim et al.,  
264 2016; Krishnamurthy et al., 2019; Santini et al., 2021; Santini et al., 2018) mitigated the  
265 excitation inhomogeneity traditionally observed at 7T MRI, potentially allowing more brain  
266 regions to be reliably quantified. Tailored preprocessing steps along with manual quality  
267 assurance and correction could further refine the automatic cortex parcellation by FreeSurfer.

268 The method of ICV correction greatly affects the results of correlation analysis, most  
269 notably in the 3T dataset. Previous studies (Wang et al., 2024) had investigated such effect on the  
270 correlation between brain volumetric measurements and cognitive performance at 3T, in which  
271 they showed that the regression based method was preferable in relation to the proportional  
272 method, which generated results that were biologically implausible. In our analysis, limited to  
273 morphometric variables alone, both correction methods were able to deliver plausible results,  
274 i.e., negative correlation between age and brain regional volumes. However, we noted that after  
275 correction using the Proportional method, the 3T dataset maintained a strong correlation between  
276 brain volumes and ICV, which could be interacting with the effect of age and thus reducing  
277 Pearson's R values. The 7T dataset, on the other hand, showed little sensitivity as to which



## 7T VS 3T BRAIN MORPHOMETRICS WITH AGE

278 correction method was used. The Residual method seems to be the preferable one, since it gives  
279 its universal applicability.

280 Previous longitudinal studies (Fjell et al., 2013; Otsuka et al., 2022) on the relationship  
281 between grey matter volume and age reported an annual rate of change around 0.4% across brain  
282 regions. In our cross-sectional linear regression analysis, we derived a mean annual rate of  
283 change of 0.32% at both 3T and 7T at the study median age. The demographics as well as the  
284 image acquisition methods varied between our dataset and those of the published data. The Fjell  
285 study was using 1.5T MRI while the cohort lacked control for cognitive performance. The cross-  
286 sectional nature of our dataset may also play a role in the difference.

287 The white matter volume showed stability over aging at 3T and a small effect size, but  
288 significant, at 7T after adjusting for ICV. Studies have shown that white matter volume  
289 progresses differently with age compared to grey matter volume. Previous studies also showed  
290 modest changes in white matter volume until 40-50 years old before an accelerated decline (Fjell  
291 et al., 2014; Fjell, 2010). Hence a simple linear regression may not be enough to fully  
292 characterize the change of white matter volume with age. Further efforts shall be made to model  
293 the white matter volume by separating the age range while controlling other factors affecting  
294 white matter such as white matter hyperintensities and perivascular spaces (Fjell et al., 2014;  
295 Fjell, 2010).

296 As we gathered this large dataset of same-subject 3T and 7T scans, there was an average  
297 scan interval of  $5.2 \pm 4.5$  years (after quality control). While the lack of field strength specific  
298 harmonization methods limited our ability to perform longitudinal analysis, the distance between  
299 the 3T and 7T scan resulted in different age distribution between groups. Fortunately, the  
300 quadratic terms are minimal in most regions, indicating that the relationship is nearly linear for  
301 the age range in this study and the impact of age differences at the scanning is relatively minor.  
302 At the moment of this analysis, information regarding comorbidities, lifestyle, cognition, AD risk  
303 factors, and other relevant factors presented in Table 2 were not included as covariates in the  
304 analysis, which could influence the change trajectory of brain morphometrics and will be subject  
305 of future study.

306 Our study also identified some limitations regarding the acquired datasets at both 3T and  
307 7T. Firstly, FreeSurfer segmentations could fail when the cortex, occipital lobe specifically, had  
308 insufficient grey matter to white matter contrast sometimes observed in the 3T datasets. Control  
309 points were placed to aid the re-run of FreeSurfer segmentation. In the case of poor global  
310 contrast caused in conjunction with motion artifact, the subject is excluded. Cortical thickness  
311 measurements could also be biased due to the inconsistent tissue boundary due to the lack of  
312 white to gray matter contrast. Secondly, due to the altered T1 relaxation time, blood vessels,  
313 otherwise invisible at 3T, are marked with ultra bright contrast on 7T MPRAGE images. These  
314 blood vessels distinguish themselves with the surrounding tissue drastically, creating challenges  
315 for FreeSurfer algorithms which are tailored to lower field strengths image contrast. Major blood  
316 vessels such as the middle cerebral artery and pericallosal artery, were oftentimes included in the  
317 segmentation of their surrounding brain regions such as the anterior cingulate cortex, the  
318 parahippocampal cortex, the entorhinal cortex, the insula cortex, and the transverse temporal  
319 cortex in the 7T image segmentations. These regions were found to be either insignificant or  
320 having a weak and inconsistent correlation with age, which could be explained by inaccurate

## 7T VS 3T BRAIN MORPHOMETRICS WITH AGE

321 segmentation. We have excluded the most effected regions from this analysis. Another tissue that  
322 was more visible at 7T was the dura. While deep learning-based brain extraction provided  
323 consistent results across magnet strength and scanning procedure for our dataset, the survival rate  
324 of dura after brain stripping remained inconsistent, resulting in inconsistent over-classification of  
325 surface temporal cortical regions in the 7T segmentations. The effect of dura is manifested in the  
326 positive correlation between parahippocampal, entorhinal cortex thickness and age. The  
327 worsened susceptibility effects at 7T also gave rise to the air-tissue interface distortion artifact  
328 near the sinus in about half of the subjects, mainly presented in the inferior border of the orbital  
329 front cortex with extreme hyperintensity, veiling the cortex's true boundary. While the impact to  
330 the volume measurement was limited, the susceptibility artifact appeared as an inevitable  
331 obstacle in calculating the true morphometrics of the region. Regarding the drawbacks  
332 encountered when segmenting the entorhinal and parahippocampal cortex with FreeSurfer,  
333 efforts have been made to address this issue: for instance, with the ASHS package and ASHS-  
334 PMC-T1 atlas, it is potentially possible to distinguish the complex tissues around the region and  
335 to generate more precise cortical/subcortical segmentations of the middle temporal lobe regions  
336 (Xie et al., 2016; Yushkevich et al., 2015).

### 337 **Conclusion**

338 In this cohort of 352 participants with paired 3T and 7T scans, we compared the statistical  
339 performance in assessing age-related brain morphological changes. Our study reaffirmed the  
340 inverse correlation between brain volumes and cortical thicknesses and age and highlighted  
341 varying correlations in different brain regions at 3T and 7T. Compared to 3T, 7T has stronger  
342 correlations of total grey matter, subcortical, and white matter volumes, and mean cortical  
343 thickness with age, and shows more brain regions in which they volumes and cortical thicknesses  
344 have statistically significant correlations with age. For comparable statistical power at 3T, the  
345 required sample size for 7T is reduced for cortical and subcortical volumes, and substantially  
346 reduced for cortical thickness.

### 347 **Acknowledgements**

348 This research was supported by the National Institutes of Health (NIH-R56AG074467, NIH-  
349 R01AG053504, NIH-P01AG025204, NIH-RF1AG053504, NIH-R01MH111265, NIH-  
350 P01HL040962, and NIH-R01DK110041) and in part by the University of Pittsburgh Center for  
351 Research Computing, RRID:SCR\_022735, through the resources provided. Specifically, this  
352 work used the HTC cluster, which is supported by NIH award number S10OD028483.

### 353 **Conflict of interest statement**

354 The authors declare no conflict of interest.

### 355 **References**

356 Andrea N Sajewski, T. S., Anthony DeFranco, Boris Keil, Hecheng Jin, Jacob Berardinelli,  
357 Jinghang Li, Cong Chu, Tiago Martins, and Tamer S Ibrahim. (2023). *An Open 60-*  
358 *channel Tx/ 32-channel Rx RF Coil System for Routine Use at 7T ISMRM,*  
359 Barisano, G., Seppehrband, F., Ma, S., Jann, K., Cabeen, R., Wang, D. J., Toga, A. W., & Law,  
360 M. (2019). Clinical 7 T MRI: Are we there yet? A review about magnetic resonance

## 7T VS 3T BRAIN MORPHOMETRICS WITH AGE

- 361 imaging at ultra-high field. *Br J Radiol*, 92(1094), 20180492.  
362 <https://doi.org/10.1259/bjr.20180492>
- 363 Benjamini, Y., & Hochberg, Y. (1995). Controlling the False Discovery Rate: A Practical and  
364 Powerful Approach to Multiple Testing. *Journal of the Royal Statistical Society. Series*  
365 *B (Methodological)*, 57(1), 289-300.  
366 <http://www.jstor.org/pitt.idm.oclc.org/stable/2346101>
- 367 Choi, U. S., Kawaguchi, H., & Kida, I. (2020). Cerebral artery segmentation based on  
368 magnetization-prepared two rapid acquisition gradient echo multi-contrast images  
369 in 7 Tesla magnetic resonance imaging. *Neuroimage*, 222, 117259.  
370 <https://doi.org/10.1016/j.neuroimage.2020.117259>
- 371 Dickerson, B. C., Bakkour, A., Salat, D. H., Feczko, E., Pacheco, J., Greve, D. N., Grodstein,  
372 F., Wright, C. I., Blacker, D., Rosas, H. D., Sperling, R. A., Atri, A., Growdon, J. H.,  
373 Hyman, B. T., Morris, J. C., Fischl, B., & Buckner, R. L. (2009). The cortical signature  
374 of Alzheimer's disease: regionally specific cortical thinning relates to symptom  
375 severity in very mild to mild AD dementia and is detectable in asymptomatic  
376 amyloid-positive individuals. *Cereb Cortex*, 19(3), 497-510.  
377 <https://doi.org/10.1093/cercor/bhn113>
- 378 Fiedler, T. M., Ladd, M. E., & Bitz, A. K. (2018). SAR Simulations & Safety. *Neuroimage*, 168,  
379 33-58. <https://doi.org/10.1016/j.neuroimage.2017.03.035>
- 380 Fischl, B. (2012). FreeSurfer. *Neuroimage*, 62(2), 774-781.  
381 <https://doi.org/10.1016/j.neuroimage.2012.01.021>
- 382 Fjell, A. M., McEvoy, L., Holland, D., Dale, A. M., Walhovd, K. B., & Alzheimer's Disease  
383 Neuroimaging, I. (2013). Brain changes in older adults at very low risk for  
384 Alzheimer's disease. *J Neurosci*, 33(19), 8237-8242.  
385 <https://doi.org/10.1523/JNEUROSCI.5506-12.2013>
- 386 Fjell, A. M., McEvoy, L., Holland, D., Dale, A. M., Walhovd, K. B., & Alzheimer's Disease  
387 Neuroimaging, I. (2014). What is normal in normal aging? Effects of aging, amyloid  
388 and Alzheimer's disease on the cerebral cortex and the hippocampus. *Prog*  
389 *Neurobiol*, 117, 20-40. <https://doi.org/10.1016/j.pneurobio.2014.02.004>
- 390 Fjell, A. M. W., Kristine B. (2010). Structural Brain Changes in Aging: Courses, Causes and  
391 Cognitive Consequences. *Reviews in the Neurosciences*.
- 392 Hoopes, A., Mora, J. S., Dalca, A. V., Fischl, B., & Hoffmann, M. (2022). SynthStrip: skull-  
393 stripping for any brain image. *Neuroimage*, 260, 119474.  
394 <https://doi.org/10.1016/j.neuroimage.2022.119474>
- 395 Ibrahim, T. S., Mitchell, C., Abraham, R., & Schmalbrock, P. (2007). In-depth study of the  
396 electromagnetics of ultrahigh-field MRI. *NMR Biomed*, 20(1), 58-68.  
397 <https://doi.org/10.1002/nbm.1094>
- 398 Ibrahim, T. S., & Tang, L. (2007). Insight into RF power requirements and B1 field  
399 homogeneity for human MRI via rigorous FDTD approach. *J Magn Reson Imaging*,  
400 25(6), 1235-1247. <https://doi.org/10.1002/jmri.20919>
- 401 Kim, J., Krishnamurthy, N., Santini, T., Zhao, Y., Zhao, T., Bae, K. T., & Ibrahim, T. S. (2016).  
402 Experimental and numerical analysis of B1(+) field and SAR with a new transmit  
403 array design for 7T breast MRI. *J Magn Reson*, 269, 55-64.  
404 <https://doi.org/10.1016/j.jmr.2016.04.012>

## 7T VS 3T BRAIN MORPHOMETRICS WITH AGE

- 405 Krishnamurthy, N., Santini, T., Wood, S., Kim, J., Zhao, T., Aizenstein, H. J., & Ibrahim, T. S.  
406 (2019). Computational and experimental evaluation of the Tic-Tac-Toe RF coil for 7  
407 Tesla MRI. *PLoS One*, *14*(1), e0209663.  
408 <https://doi.org/10.1371/journal.pone.0209663>
- 409 Lusebrink, F., Wollrab, A., & Speck, O. (2013). Cortical thickness determination of the  
410 human brain using high resolution 3T and 7T MRI data. *Neuroimage*, *70*, 122-131.  
411 <https://doi.org/10.1016/j.neuroimage.2012.12.016>
- 412 Okada, T., Fujimoto, K., Fushimi, Y., Akasaka, T., Thuy, D. H. D., Shima, A., Sawamoto, N.,  
413 Oishi, N., Zhang, Z., Funaki, T., Nakamoto, Y., Murai, T., Miyamoto, S., Takahashi, R.,  
414 & Isa, T. (2022). Neuroimaging at 7 Tesla: a pictorial narrative review. *Quant Imaging*  
415 *Med Surg*, *12*(6), 3406-3435. <https://doi.org/10.21037/qims-21-969>
- 416 Otsuka, R., Nishita, Y., Nakamura, A., Kato, T., Ando, F., Shimokata, H., & Arai, H. (2022).  
417 Basic lifestyle habits and volume change in total gray matter among community  
418 dwelling middle-aged and older Japanese adults. *Prev Med*, *161*, 107149.  
419 <https://doi.org/10.1016/j.ypmed.2022.107149>
- 420 Perera Molligoda Arachchige, A. S., & Garner, A. K. (2023). Seven Tesla MRI in Alzheimer's  
421 disease research: State of the art and future directions: A narrative review. *AIMS*  
422 *Neurosci*, *10*(4), 401-422. <https://doi.org/10.3934/Neuroscience.2023030>
- 423 Santini, T., Wood, S., Krishnamurthy, N., Martins, T., Aizenstein, H. J., & Ibrahim, T. S. (2021).  
424 Improved 7 Tesla transmit field homogeneity with reduced electromagnetic power  
425 deposition using coupled Tic Tac Toe antennas. *Sci Rep*, *11*(1), 3370.  
426 <https://doi.org/10.1038/s41598-020-79807-9>
- 427 Santini, T., Zhao, Y., Wood, S., Krishnamurthy, N., Kim, J., Farhat, N., Alkhateeb, S., Martins,  
428 T., Koo, M., Zhao, T., Aizenstein, H. J., & Ibrahim, T. S. (2018). In-vivo and numerical  
429 analysis of the eigenmodes produced by a multi-level Tic-Tac-Toe head transmit  
430 array for 7 Tesla MRI. *PLoS One*, *13*(11), e0206127.  
431 <https://doi.org/10.1371/journal.pone.0206127>
- 432 Seiger, R., Hahn, A., Hummer, A., Kranz, G. S., Ganger, S., Kublbock, M., Kraus, C., Sladky,  
433 R., Kasper, S., Windischberger, C., & Lanzenberger, R. (2015). Voxel-based  
434 morphometry at ultra-high fields. a comparison of 7T and 3T MRI data. *Neuroimage*,  
435 *113*, 207-216. <https://doi.org/10.1016/j.neuroimage.2015.03.019>
- 436 Springer, E., Dymerska, B., Cardoso, P. L., Robinson, S. D., Weisstanner, C., Wiest, R.,  
437 Schmitt, B., & Trattnig, S. (2016). Comparison of Routine Brain Imaging at 3 T and 7 T.  
438 *Invest Radiol*, *51*(8), 469-482. <https://doi.org/10.1097/RLI.0000000000000256>
- 439 *Statistical Parametric Mapping: The Analysis of Functional Brain Images*. (2006). (K. J. F.  
440 William D. Penny, John T. Ashburner, Stefan J. Kiebel, Thomas E. Nichols, Ed. 1 ed.).
- 441 Truong, T. K., Chakeres, D. W., Beversdorf, D. Q., Scharre, D. W., & Schmalbrock, P. (2006).  
442 Effects of static and radiofrequency magnetic field inhomogeneity in ultra-high field  
443 magnetic resonance imaging. *Magn Reson Imaging*, *24*(2), 103-112.  
444 <https://doi.org/10.1016/j.mri.2005.09.013>
- 445 US FDA. (2024). *510(k) Premarket Notification for MAGNETOM Terra; MAGNETOM Terra.X*.
- 446 Viviani, R., Pracht, E. D., Brenner, D., Beschoner, P., Stingl, J. C., & Stocker, T. (2017).  
447 Multimodal MEMPRAGE, FLAIR, and [Formula: see text] Segmentation to Resolve

## 7T VS 3T BRAIN MORPHOMETRICS WITH AGE

- 448 Dura and Vessels from Cortical Gray Matter. *Front Neurosci*, 11, 258.  
449 <https://doi.org/10.3389/fnins.2017.00258>
- 450 Wang, J., Hill-Jarrett, T., Buto, P., Pederson, A., Sims, K. D., Zimmerman, S. C., DeVost, M.  
451 A., Ferguson, E., Lacar, B., Yang, Y., Choi, M., Caunca, M. R., La Joie, R., Chen, R.,  
452 Glymour, M. M., & Ackley, S. F. (2024). Comparison of approaches to control for  
453 intracranial volume in research on the association of brain volumes with cognitive  
454 outcomes. *Hum Brain Mapp*, 45(4), e26633. <https://doi.org/10.1002/hbm.26633>
- 455 Xie, L., Wisse, L. E. M., Das, S. R., Wang, H., Wolk, D. A., Manjón, J. V., & Yushkevich, P. A.  
456 (2016). Accounting for the Confound of Meninges in Segmenting Entorhinal and  
457 Perirhinal Cortices in T1-Weighted MRI. In S. Ourselin, L. Joskowicz, M. R. Sabuncu,  
458 G. Unal, & W. Wells, *Medical Image Computing and Computer-Assisted Intervention*  
459 – MICCAI 2016 Cham.
- 460 Yushkevich, P. A., Pluta, J. B., Wang, H., Xie, L., Ding, S. L., Gertje, E. C., Mancuso, L., Klot,  
461 D., Das, S. R., & Wolk, D. A. (2015). Automated volumetry and regional thickness  
462 analysis of hippocampal subfields and medial temporal cortical structures in mild  
463 cognitive impairment. *Hum Brain Mapp*, 36(1), 258-287.  
464 <https://doi.org/10.1002/hbm.22627>
- 465
- 466

## 7T VS 3T BRAIN MORPHOMETRICS WITH AGE

467 **Table 1.** T1-weighted Magnetization Prepared RApid Gradient Echo (MPRAGE) sequence  
 468 parameters at 3T and 7T.

| Scanner                               | 3T                   |                  |            | 7T                                                          |                                                             |
|---------------------------------------|----------------------|------------------|------------|-------------------------------------------------------------|-------------------------------------------------------------|
|                                       | Siemens Trio         | Siemens Prisma   |            | Siemens Magnetom                                            |                                                             |
| Coil                                  | Transmit: Body Coil  |                  |            | Transmit: 1st generation Tic-Tac-Toe head coil, 16 channels | Transmit: 2nd generation Tic-Tac-Toe head coil, 60 channels |
|                                       | Receive: 32-channels |                  |            | Receive: 32-channels                                        |                                                             |
| Resolution                            | 1 mm iso             | 0.5 x 0.5 x 1 mm | 0.8 mm iso | 0.75 mm iso                                                 | 0.75 mm iso                                                 |
| Repetition time (ms)                  | 1500                 | 3650             | 2400       | 3000                                                        | 3000                                                        |
| Echo time (ms)                        | 3.19                 | 2.53             | 2.22       | 2.17                                                        | 1.96                                                        |
| Inversion time (ms)                   | 800                  | 1200             | 1000       | 1200                                                        | 1200                                                        |
| Grappa                                | 0                    | 2                | 2          | 2                                                           | 2                                                           |
| Acquisition time (min)                | 04:48                | 09:55            | 6:35       | 5:02                                                        | 5:02                                                        |
| Number of scans after quality control | 144                  | 160              | 48         | 264                                                         | 88                                                          |

469

## 7T VS 3T BRAIN MORPHOMETRICS WITH AGE

470 **Table 2.** Demographics and medical history of 352 participants. SD stands for standard  
471 deviation.

|                                                 | 3T                      | 7T                      |
|-------------------------------------------------|-------------------------|-------------------------|
| Sample size, n                                  | 352                     |                         |
| Sex female, n (%)                               | 210 (59.7)              |                         |
| Race white, n (%)                               | 308 (87.5)              |                         |
| Years of education, mean (SD)                   | 17.3 (2.7)              |                         |
| High blood pressure, n (%)                      | 5 (1.4)                 |                         |
| Heart murmur, n (%)                             | 10 (2.8)                |                         |
| Heart surgery, n (%)                            | 0                       |                         |
| Diabetes, n (%)                                 | 2 (0.6)                 |                         |
| Depression, n (%)                               | 1 (0.3)                 |                         |
| Panic attacks, n (%)                            | 3 (0.9)                 |                         |
| Other anxiety disorder, n (%)                   | 12 (3.4)                |                         |
| Post traumatic disorder, n (%)                  | 0                       |                         |
| Age at scan, mean (SD)                          | 45.7 (9.2)              | 50.9 (9.3)              |
| Intracranial volume mm <sup>3</sup> , mean (SD) | 1.5521e+06 (1.4695e+05) | 1.4912e+06 (1.3767e+05) |

472

## 7T VS 3T BRAIN MORPHOMETRICS WITH AGE

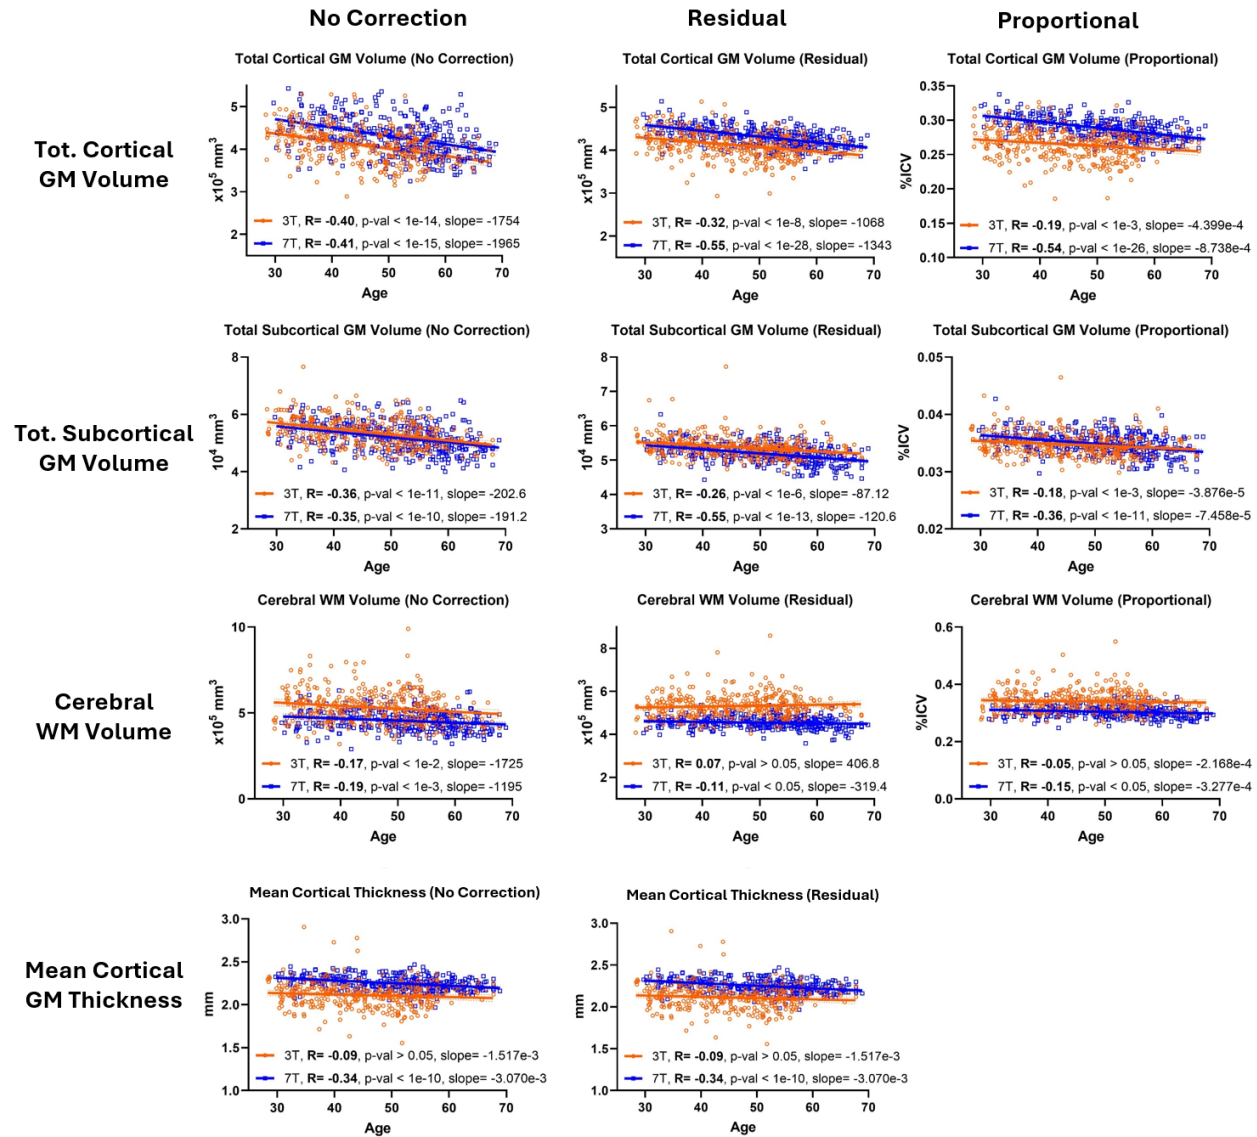

473  
 474 **Figure 1. 7T has a stronger inverse correlation of total cortical grey matter volume, total**  
 475 **subcortical grey matter volume, total white matter volume, and mean cortical thickness**  
 476 **with age.** Brain morphometric correlations with age using 352 pairs of 3T and 7T MPRAGE  
 477 scans, including the raw volumes (No Correction) and corrected for ICV using either residuals  
 478 from regression model (Residual method) or division by ICV (Proportional method). Correlation  
 479 between the ICV derived from 3T and 7T was shown to demonstrate consistent brain stripping  
 480 results.



## 7T VS 3T BRAIN MORPHOMETRICS WITH AGE

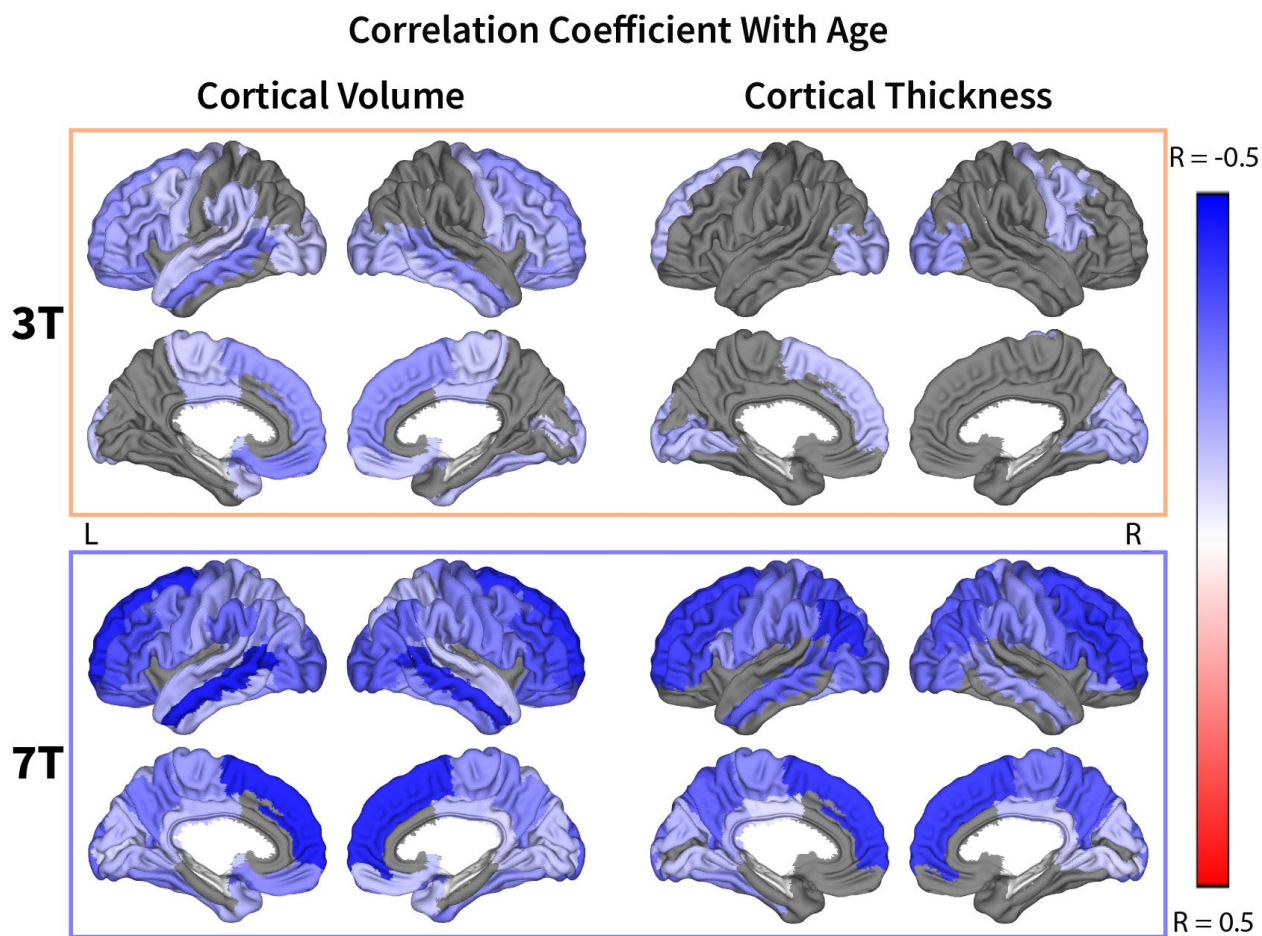

481

482 **Figure 2. 7T shows more significant regions in correlation of total grey matter volume or**  
483 **mean cortical thickness with age.** Cortical regions corrected for ICV using Residual method  
484 and sex and found significant after FDR correction are shown with their respective Pearson  
485 correlation coefficient (positive correlation, blue; insignificant, grey; inverse correlation, red).  
486 Vessel-affected regions were removed. Cortical thicknesses were only corrected for sex.

## 7T VS 3T BRAIN MORPHOMETRICS WITH AGE

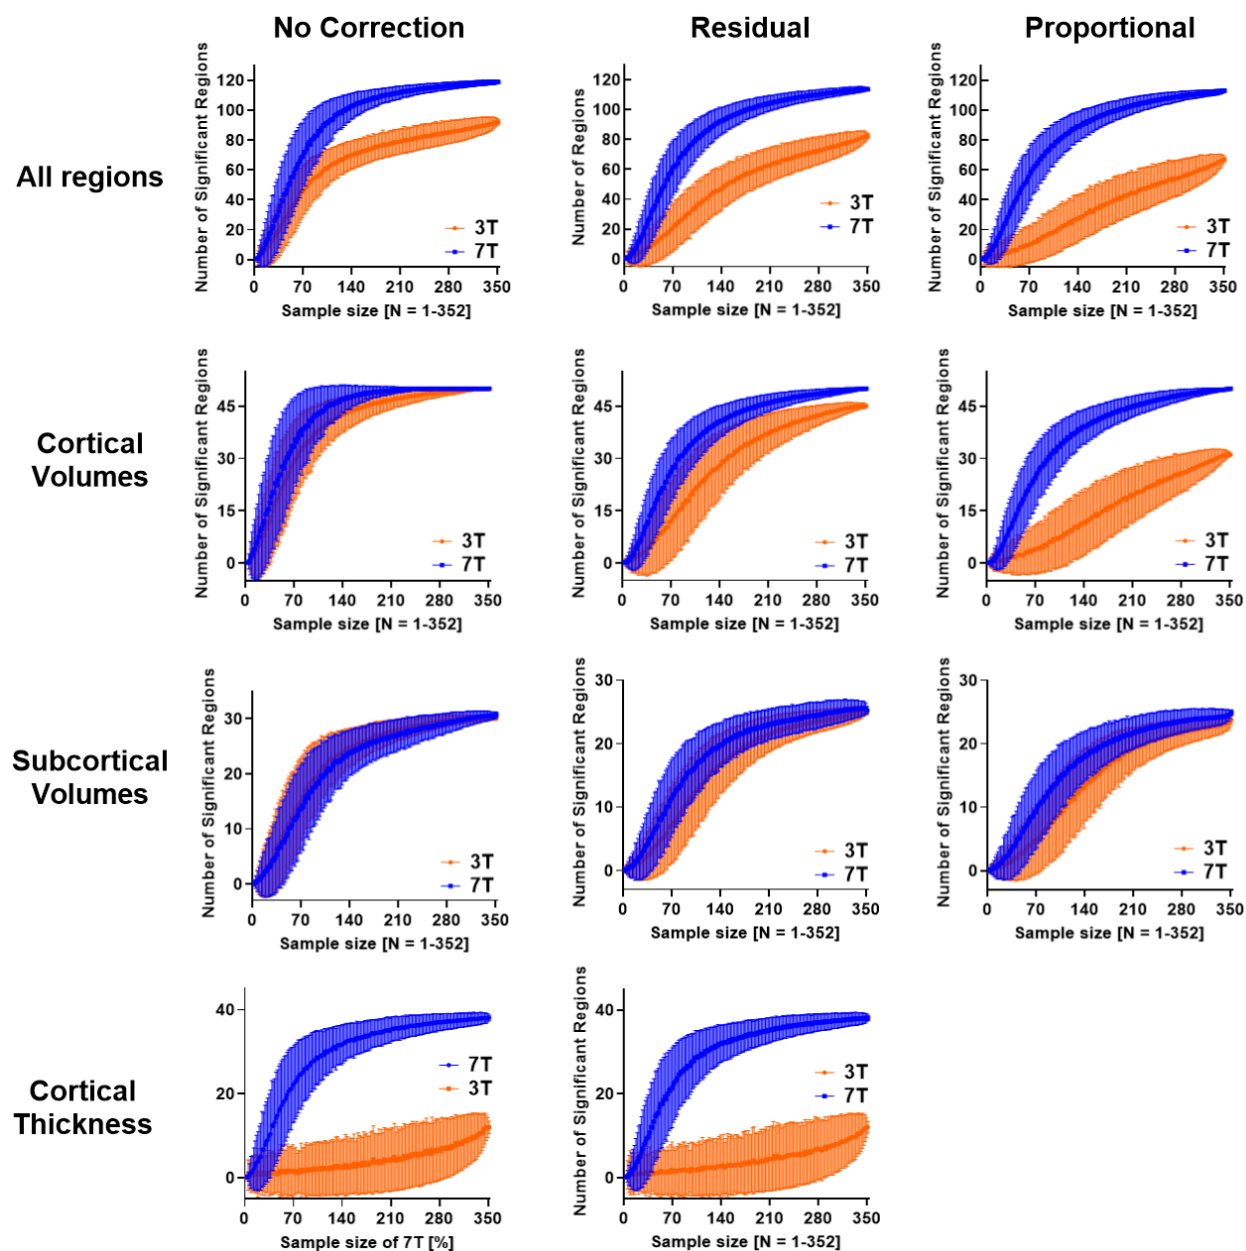

487

488 **Figure 3. 7T reduces required sample size in all regions, cortical volumes, subcortical**  
489 **volumes, and cortical thickness.** Number of significant regions in raw volumes (no correction)  
490 and corrected for ICV using both the Residual and Proportional methods observed with  
491 increasing sample size significantly differed between 3T and 7T.

## 7T VS 3T BRAIN MORPHOMETRICS WITH AGE

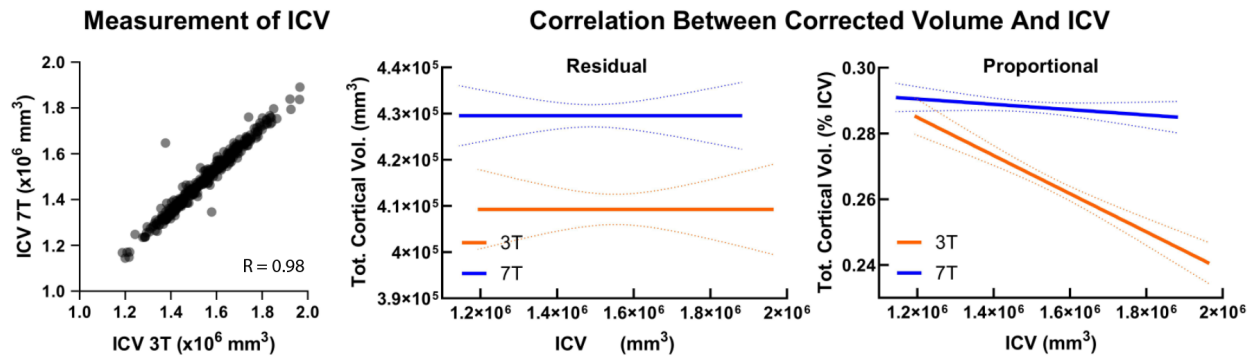

492  
493 **Figure 4. 7T-derived ICV is consistent with that derived from 3T but more accurate in**  
494 **regional volumes.** Comparison between the ICV value calculated at 3T and 7T as well as the  
495 effect of different ICV correction (Residual and Proportional) methods. Ideal correction should  
496 result in no correlation between total cortical volume and ICV. Dashed lines represent 95%  
497 confidence intervals. For the Residual method, both correlations showed no significant non-zero  
498 slope. For the Proportional method, 7T data showed no significant non-zero slope ( $p = 0.17$ )  
499 while the 3T data showed non-zero slope ( $p < 0.0001$ ).

## 7T VS 3T BRAIN MORPHOMETRICS WITH AGE

### Cortical Volume Annual Rate of Change Calculated at Median Age

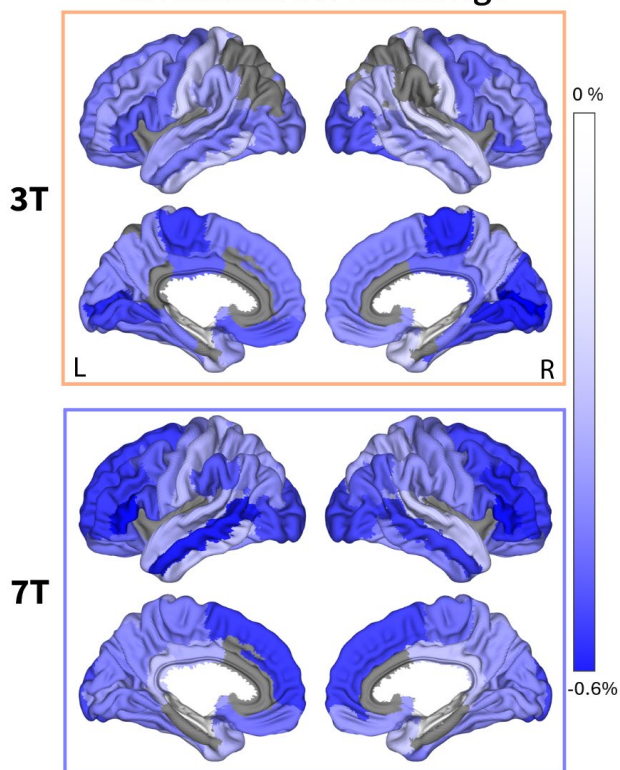

500

501 **Figure 5. Mean cortical volume annual rate of change measured at 0.32% for both 3T and**  
502 **7T. Cortical volumes were corrected for ICV using the Residual method, and the median age of**  
503 **the population used for this analysis is 52 years old.**
